# Supplementary material for: Targeting circGDI2 disrupt HNRNPC-mediated mPORCN stabilization and enhance LGK-974 anti-tumor therapy in hepatocellular carcinoma
Source: Mol Cancer. 2026 Mar 10;25:110. doi: 10.1186/s12943-026-02638-1 (PMC13088843; doi:10.1186/s12943-026-02638-1)
Supplement: Supplementary file 1 — Supplementary Material 1. [file 12943_2026_2638_MOESM1_ESM.xlsx]

## Sheet: HNRNPC linked mPORCN
Protein_ID	ProteinFrag_start	ProteinFrag_end	RNA_ID	rnaFrag_start	rnaFrag_end	Annotation	Interaction_Propensity
untitled.protein	231	282	untitled.rna	1	80	-	29.5
untitled.protein	201	252	untitled.rna	809	888	-	21.8
untitled.protein	201	252	untitled.rna	820	899	-	20.4
untitled.protein	201	252	untitled.rna	848	927	-	19.9
untitled.protein	201	252	untitled.rna	1015	1094	-	19.0
untitled.protein	201	252	untitled.rna	692	771	-	18.6
untitled.protein	231	282	untitled.rna	848	927	-	17.7
untitled.protein	201	252	untitled.rna	1823	1902	-	17.2
untitled.protein	201	252	untitled.rna	653	732	-	17.2
untitled.protein	201	252	untitled.rna	29	108	-	17.2
untitled.protein	231	282	untitled.rna	820	899	-	17.0
untitled.protein	201	252	untitled.rna	1834	1913	-	17.0
untitled.protein	76	127	untitled.rna	29	108	-	16.9
untitled.protein	206	257	untitled.rna	692	771	-	16.8
untitled.protein	251	302	untitled.rna	809	888	-	16.8
untitled.protein	231	282	untitled.rna	692	771	-	16.8
untitled.protein	206	257	untitled.rna	1015	1094	-	16.7
untitled.protein	81	132	untitled.rna	664	743	-	16.6
untitled.protein	76	127	untitled.rna	848	927	-	16.6
untitled.protein	251	302	untitled.rna	664	743	-	16.6
untitled.protein	256	307	untitled.rna	1	80	-	16.6
untitled.protein	231	282	untitled.rna	29	108	-	16.3
untitled.protein	26	77	untitled.rna	40	119	-	16.2
untitled.protein	126	177	untitled.rna	1	80	-	16.2
untitled.protein	151	202	untitled.rna	29	108	-	16.1
untitled.protein	76	127	untitled.rna	40	119	-	16.0
untitled.protein	81	132	untitled.rna	1834	1913	-	16.0
untitled.protein	206	257	untitled.rna	29	108	-	15.9
untitled.protein	81	132	untitled.rna	703	782	-	15.9
untitled.protein	251	302	untitled.rna	820	899	-	15.8
untitled.protein	26	77	untitled.rna	848	927	-	15.8
untitled.protein	76	127	untitled.rna	664	743	-	15.8
untitled.protein	201	252	untitled.rna	40	119	-	15.8
untitled.protein	256	307	untitled.rna	809	888	-	15.7
untitled.protein	76	127	untitled.rna	692	771	-	15.7
untitled.protein	231	282	untitled.rna	1015	1094	-	15.5
untitled.protein	206	257	untitled.rna	1823	1902	-	15.5
untitled.protein	151	202	untitled.rna	40	119	-	15.5
untitled.protein	206	257	untitled.rna	1834	1913	-	15.4
untitled.protein	201	252	untitled.rna	703	782	-	15.4
untitled.protein	206	257	untitled.rna	653	732	-	15.4
untitled.protein	106	157	untitled.rna	664	743	-	15.4
untitled.protein	226	277	untitled.rna	664	743	-	15.3
untitled.protein	176	227	untitled.rna	1004	1083	-	15.3
untitled.protein	201	252	untitled.rna	1795	1874	-	15.3
untitled.protein	231	282	untitled.rna	1834	1913	-	15.3
untitled.protein	181	232	untitled.rna	1004	1083	-	15.2
untitled.protein	231	282	untitled.rna	40	119	-	15.2
untitled.protein	231	282	untitled.rna	1823	1902	-	15.2
untitled.protein	251	302	untitled.rna	1015	1094	-	15.2
untitled.protein	26	77	untitled.rna	692	771	-	15.1
untitled.protein	81	132	untitled.rna	859	938	-	15.1
untitled.protein	81	132	untitled.rna	1823	1902	-	15.1
untitled.protein	81	132	untitled.rna	809	888	-	15.0
untitled.protein	256	307	untitled.rna	664	743	-	15.0
untitled.protein	6	57	untitled.rna	809	888	-	14.9
untitled.protein	151	202	untitled.rna	848	927	-	14.9
untitled.protein	226	277	untitled.rna	809	888	-	14.9
untitled.protein	6	57	untitled.rna	664	743	-	14.9
untitled.protein	256	307	untitled.rna	1795	1874	-	14.8
untitled.protein	256	307	untitled.rna	820	899	-	14.8
untitled.protein	206	257	untitled.rna	40	119	-	14.8
untitled.protein	231	282	untitled.rna	653	732	-	14.7
untitled.protein	106	157	untitled.rna	809	888	-	14.6
untitled.protein	256	307	untitled.rna	1015	1094	-	14.6
untitled.protein	76	127	untitled.rna	1834	1913	-	14.5
untitled.protein	76	127	untitled.rna	809	888	-	14.4
untitled.protein	201	252	untitled.rna	1004	1083	-	14.4
untitled.protein	201	252	untitled.rna	859	938	-	14.4
untitled.protein	151	202	untitled.rna	692	771	-	14.4
untitled.protein	56	107	untitled.rna	664	743	-	14.3
untitled.protein	56	107	untitled.rna	809	888	-	14.2
untitled.protein	231	282	untitled.rna	703	782	-	14.2
untitled.protein	76	127	untitled.rna	703	782	-	14.2
untitled.protein	206	257	untitled.rna	703	782	-	14.2
untitled.protein	201	252	untitled.rna	1043	1122	-	14.1
untitled.protein	81	132	untitled.rna	820	899	-	14.0
untitled.protein	6	57	untitled.rna	820	899	-	14.0
untitled.protein	51	102	untitled.rna	664	743	-	14.0
untitled.protein	26	77	untitled.rna	664	743	-	14.0
untitled.protein	26	77	untitled.rna	703	782	-	14.0
untitled.protein	226	277	untitled.rna	820	899	-	14.0
untitled.protein	51	102	untitled.rna	809	888	-	13.9
untitled.protein	81	132	untitled.rna	653	732	-	13.9
untitled.protein	251	302	untitled.rna	1795	1874	-	13.9
untitled.protein	26	77	untitled.rna	1834	1913	-	13.9
untitled.protein	201	252	untitled.rna	469	548	-	13.9
untitled.protein	101	152	untitled.rna	1	80	-	13.9
untitled.protein	76	127	untitled.rna	1823	1902	-	13.8
untitled.protein	106	157	untitled.rna	820	899	-	13.7
untitled.protein	201	252	untitled.rna	1327	1406	-	13.6
untitled.protein	6	57	untitled.rna	1015	1094	-	13.5
untitled.protein	81	132	untitled.rna	1043	1122	-	13.5
untitled.protein	106	157	untitled.rna	848	927	-	13.5
untitled.protein	76	127	untitled.rna	820	899	-	13.5
untitled.protein	231	282	untitled.rna	859	938	-	13.5
untitled.protein	76	127	untitled.rna	859	938	-	13.4
untitled.protein	26	77	untitled.rna	859	938	-	13.3
untitled.protein	226	277	untitled.rna	848	927	-	13.3
untitled.protein	56	107	untitled.rna	820	899	-	13.3
untitled.protein	181	232	untitled.rna	848	927	-	13.2
untitled.protein	206	257	untitled.rna	859	938	-	13.2
untitled.protein	151	202	untitled.rna	703	782	-	13.2
untitled.protein	181	232	untitled.rna	653	732	-	13.2
untitled.protein	206	257	untitled.rna	1795	1874	-	13.2
untitled.protein	151	202	untitled.rna	1834	1913	-	13.1
untitled.protein	51	102	untitled.rna	820	899	-	13.1
untitled.protein	131	182	untitled.rna	1	80	-	13.0
untitled.protein	31	82	untitled.rna	664	743	-	13.0
untitled.protein	76	127	untitled.rna	653	732	-	13.0
untitled.protein	26	77	untitled.rna	1823	1902	-	13.0
untitled.protein	226	277	untitled.rna	1015	1094	-	13.0
untitled.protein	151	202	untitled.rna	664	743	-	12.9
untitled.protein	206	257	untitled.rna	1043	1122	-	12.8
untitled.protein	151	202	untitled.rna	859	938	-	12.8
untitled.protein	231	282	untitled.rna	1043	1122	-	12.8
untitled.protein	256	307	untitled.rna	1004	1083	-	12.8
untitled.protein	106	157	untitled.rna	1015	1094	-	12.7
untitled.protein	56	107	untitled.rna	1015	1094	-	12.7
untitled.protein	6	57	untitled.rna	1795	1874	-	12.7
untitled.protein	81	132	untitled.rna	1054	1133	-	12.6
untitled.protein	26	77	untitled.rna	809	888	-	12.6
untitled.protein	206	257	untitled.rna	1004	1083	-	12.6
untitled.protein	106	157	untitled.rna	692	771	-	12.6
untitled.protein	226	277	untitled.rna	692	771	-	12.6
untitled.protein	251	302	untitled.rna	1004	1083	-	12.5
untitled.protein	206	257	untitled.rna	469	548	-	12.5
untitled.protein	51	102	untitled.rna	1015	1094	-	12.5
untitled.protein	201	252	untitled.rna	1366	1445	-	12.4
untitled.protein	31	82	untitled.rna	809	888	-	12.4
untitled.protein	31	82	untitled.rna	848	927	-	12.4
untitled.protein	231	282	untitled.rna	469	548	-	12.3
untitled.protein	181	232	untitled.rna	692	771	-	12.3
untitled.protein	81	132	untitled.rna	469	548	-	12.3
untitled.protein	81	132	untitled.rna	1015	1094	-	12.3
untitled.protein	181	232	untitled.rna	1823	1902	-	12.2
untitled.protein	76	127	untitled.rna	1043	1122	-	12.2
untitled.protein	151	202	untitled.rna	1823	1902	-	12.2
untitled.protein	206	257	untitled.rna	1327	1406	-	12.1
untitled.protein	201	252	untitled.rna	458	537	-	12.1
untitled.protein	201	252	untitled.rna	1483	1562	-	12.1
untitled.protein	176	227	untitled.rna	653	732	-	12.0
untitled.protein	251	302	untitled.rna	848	927	-	12.0
untitled.protein	201	252	untitled.rna	1054	1133	-	12.0
untitled.protein	156	207	untitled.rna	664	743	-	12.0
untitled.protein	76	127	untitled.rna	1015	1094	-	12.0
untitled.protein	201	252	untitled.rna	1316	1395	-	11\
untitled.protein	26	77	untitled.rna	1043	1122	-	11.8
untitled.protein	26	77	untitled.rna	653	732	-	11.8
untitled.protein	26	77	untitled.rna	820	899	-	11.8
untitled.protein	106	157	untitled.rna	29	108	-	11.8
untitled.protein	31	82	untitled.rna	692	771	-	11.7
untitled.protein	106	157	untitled.rna	653	732	-	11.7
untitled.protein	106	157	untitled.rna	1823	1902	-	11.7
untitled.protein	231	282	untitled.rna	1795	1874	-	11.7
untitled.protein	31	82	untitled.rna	820	899	-	11.6
untitled.protein	181	232	untitled.rna	1327	1406	-	11.6
untitled.protein	151	202	untitled.rna	809	888	-	11.6
untitled.protein	106	157	untitled.rna	1834	1913	-	11.6
untitled.protein	226	277	untitled.rna	1823	1902	-	11.5
untitled.protein	31	82	untitled.rna	29	108	-	11.5
untitled.protein	156	207	untitled.rna	809	888	-	11.5
untitled.protein	231	282	untitled.rna	1004	1083	-	11.5
untitled.protein	231	282	untitled.rna	1327	1406	-	11.5
untitled.protein	226	277	untitled.rna	29	108	-	11.5
untitled.protein	226	277	untitled.rna	653	732	-	11.4
untitled.protein	201	252	untitled.rna	419	498	-	11.4
untitled.protein	251	302	untitled.rna	653	732	-	11.4
untitled.protein	226	277	untitled.rna	1834	1913	-	11.4
untitled.protein	176	227	untitled.rna	848	927	-	11.4
untitled.protein	156	207	untitled.rna	848	927	-	11.3
untitled.protein	201	252	untitled.rna	625	704	-	11.3
untitled.protein	56	107	untitled.rna	1795	1874	-	11.3
untitled.protein	76	127	untitled.rna	1054	1133	-	11.2
untitled.protein	151	202	untitled.rna	1043	1122	-	11.2
untitled.protein	251	302	untitled.rna	692	771	-	11.2
untitled.protein	76	127	untitled.rna	469	548	-	11.2
untitled.protein	6	57	untitled.rna	1004	1083	-	11.2
untitled.protein	231	282	untitled.rna	1054	1133	-	11.2
untitled.protein	26	77	untitled.rna	1054	1133	-	11.1
untitled.protein	51	102	untitled.rna	1795	1874	-	11.1
untitled.protein	56	107	untitled.rna	848	927	-	11.0
untitled.protein	151	202	untitled.rna	653	732	-	11.0
untitled.protein	206	257	untitled.rna	1054	1133	-	11.0
untitled.protein	206	257	untitled.rna	1366	1445	-	11.0
untitled.protein	156	207	untitled.rna	820	899	-	11.0
untitled.protein	181	232	untitled.rna	1366	1445	-	11.0
untitled.protein	151	202	untitled.rna	820	899	-	11.0
untitled.protein	176	227	untitled.rna	1327	1406	-	11.0
untitled.protein	251	302	untitled.rna	1834	1913	-	10\
untitled.protein	156	207	untitled.rna	692	771	-	10.9
untitled.protein	181	232	untitled.rna	1834	1913	-	10.9
untitled.protein	251	302	untitled.rna	1823	1902	-	10.9
untitled.protein	1	52	untitled.rna	1795	1874	-	10.9
untitled.protein	201	252	untitled.rna	430	509	-	10.9
untitled.protein	176	227	untitled.rna	1823	1902	-	10.8
untitled.protein	206	257	untitled.rna	458	537	-	10.8
untitled.protein	31	82	untitled.rna	40	119	-	10.8
untitled.protein	106	157	untitled.rna	40	119	-	10.8
untitled.protein	206	257	untitled.rna	1483	1562	-	10.8
untitled.protein	81	132	untitled.rna	458	537	-	10.8
untitled.protein	51	102	untitled.rna	848	927	-	10.7
untitled.protein	231	282	untitled.rna	458	537	-	10.7
untitled.protein	31	82	untitled.rna	1834	1913	-	10.6
untitled.protein	226	277	untitled.rna	40	119	-	10.6
untitled.protein	151	202	untitled.rna	1054	1133	-	10.6
untitled.protein	176	227	untitled.rna	1784	1863	-	10.6
untitled.protein	26	77	untitled.rna	469	548	-	10.6
untitled.protein	31	82	untitled.rna	1015	1094	-	10.5
untitled.protein	6	57	untitled.rna	848	927	-	10.5
untitled.protein	106	157	untitled.rna	703	782	-	10.5
untitled.protein	201	252	untitled.rna	1639	1718	-	10.5
untitled.protein	176	227	untitled.rna	1366	1445	-	10.5
untitled.protein	31	82	untitled.rna	1823	1902	-	10.5
untitled.protein	176	227	untitled.rna	692	771	-	10.5
untitled.protein	156	207	untitled.rna	29	108	-	10.5
untitled.protein	101	152	untitled.rna	664	743	-	10.4
untitled.protein	226	277	untitled.rna	1795	1874	-	10.4
untitled.protein	176	227	untitled.rna	937	1016	-	10.4
untitled.protein	101	152	untitled.rna	809	888	-	10.4
untitled.protein	231	282	untitled.rna	1483	1562	-	10.3
untitled.protein	226	277	untitled.rna	703	782	-	10.3
untitled.protein	6	57	untitled.rna	653	732	-	10.3
untitled.protein	56	107	untitled.rna	692	771	-	10.2
untitled.protein	56	107	untitled.rna	1004	1083	-	10.2
untitled.protein	206	257	untitled.rna	419	498	-	10.2
untitled.protein	56	107	untitled.rna	653	732	-	10.2
untitled.protein	106	157	untitled.rna	1795	1874	-	10.2
untitled.protein	26	77	untitled.rna	1015	1094	-	10.2
untitled.protein	231	282	untitled.rna	1366	1445	-	10.1
untitled.protein	81	132	untitled.rna	1327	1406	-	10.1
untitled.protein	206	257	untitled.rna	625	704	-	10.1
untitled.protein	51	102	untitled.rna	1004	1083	-	10.1
untitled.protein	31	82	untitled.rna	653	732	-	10.1
untitled.protein	31	82	untitled.rna	703	782	-	10.0
untitled.protein	181	232	untitled.rna	937	1016	-	10.0
untitled.protein	151	202	untitled.rna	469	548	-	10.0
untitled.protein	226	277	untitled.rna	1004	1083	-	10.0
untitled.protein	51	102	untitled.rna	692	771	-	10.0
