# Supplementary material for: Targeting circGDI2 disrupt HNRNPC-mediated mPORCN stabilization and enhance LGK-974 anti-tumor therapy in hepatocellular carcinoma
Source: Mol Cancer. 2026 Mar 10;25:110. doi: 10.1186/s12943-026-02638-1 (PMC13088843; doi:10.1186/s12943-026-02638-1)
Supplement: Supplementary file 2 — Supplementary Material 2. [file 12943_2026_2638_MOESM2_ESM.xlsx]

## Sheet:  circGDI2 linked HNRNPC
Protein_ID	ProteinFrag_start	ProteinFrag_end	RNA_ID	rnaFrag_start	rnaFrag_end	Annotation	Interaction_Propensity\	Interaction_Propensity
untitled.protein	1	52	untitled.rna	99	150	-	5.57\	5.57
untitled.protein	1	52	untitled.rna	574	625	-	4.13\	4.13
untitled.protein	1	52	untitled.rna	101	152	-	4.11\	4.11
untitled.protein	1	52	untitled.rna	474	525	-	3.31\	3.31
untitled.protein	176	227	untitled.rna	474	525	-	2.92\	2.92
untitled.protein	1	52	untitled.rna	476	527	-	2.78\	2.78
untitled.protein	176	227	untitled.rna	124	175	-	2.72\	2.72
untitled.protein	256	307	untitled.rna	474	525	-	2.62\	2.62
untitled.protein	181	232	untitled.rna	124	175	-	2.59\	2.59
untitled.protein	1	52	untitled.rna	399	450	-	2.41\	2.41
untitled.protein	1	52	untitled.rna	576	627	-	2.29\	2.29
untitled.protein	1	52	untitled.rna	624	675	-	2.29\	2.29
untitled.protein	181	232	untitled.rna	474	525	-	2.26\	2.26
untitled.protein	1	52	untitled.rna	551	602	-	2.22\	2.22
untitled.protein	256	307	untitled.rna	124	175	-	2.19\	2.19
untitled.protein	256	307	untitled.rna	99	150	-	2.17\	2.17
untitled.protein	201	252	untitled.rna	124	175	-	2.08\	2.08
untitled.protein	251	302	untitled.rna	124	175	-	2.04\	2.04
untitled.protein	1	52	untitled.rna	401	452	-	1.95\	1.95
untitled.protein	176	227	untitled.rna	99	150	-	1.92\	1.92
untitled.protein	1	52	untitled.rna	549	600	-	1.87\	1.87
untitled.protein	6	57	untitled.rna	124	175	-	1.84\	1.84
untitled.protein	201	252	untitled.rna	126	177	-	1.84\	1.84
untitled.protein	206	257	untitled.rna	124	175	-	1.72\	1.72
untitled.protein	231	282	untitled.rna	126	177	-	1.72\	1.72
untitled.protein	1	52	untitled.rna	124	175	-	1.69\	1.69
untitled.protein	206	257	untitled.rna	126	177	-	1.62\	1.62
untitled.protein	56	107	untitled.rna	124	175	-	1.59\	1.59
untitled.protein	231	282	untitled.rna	124	175	-	1.59\	1.59
untitled.protein	51	102	untitled.rna	124	175	-	1.57\	1.57
untitled.protein	81	132	untitled.rna	126	177	-	1.56\	1.56
untitled.protein	176	227	untitled.rna	476	527	-	1.56\	1.56
untitled.protein	181	232	untitled.rna	126	177	-	1.56\	1.56
untitled.protein	176	227	untitled.rna	624	675	-	1.54\	1.54
untitled.protein	176	227	untitled.rna	126	177	-	1.49\	1.49
untitled.protein	251	302	untitled.rna	474	525	-	1.48\	1.48
untitled.protein	256	307	untitled.rna	476	527	-	1.48\	1.48
untitled.protein	1	52	untitled.rna	374	425	-	1.43\	1.43
untitled.protein	256	307	untitled.rna	624	675	-	1.42\	1.42
untitled.protein	26	77	untitled.rna	126	177	-	1.41\	1.41
untitled.protein	76	127	untitled.rna	126	177	-	1.41\	1.41
untitled.protein	151	202	untitled.rna	126	177	-	1.41\	1.41
untitled.protein	176	227	untitled.rna	349	400	-	1.41\	1.41
untitled.protein	226	277	untitled.rna	124	175	-	1.41\	1.41
untitled.protein	6	57	untitled.rna	474	525	-	1.39\	1.39
untitled.protein	251	302	untitled.rna	126	177	-	1.39\	1.39
untitled.protein	106	157	untitled.rna	124	175	-	1.38\	1.38
untitled.protein	1	52	untitled.rna	424	475	-	1.36\	1.36
untitled.protein	1	52	untitled.rna	524	575	-	1.33\	1.33
untitled.protein	226	277	untitled.rna	126	177	-	1.33\	1.33
untitled.protein	156	207	untitled.rna	126	177	-	1.29\	1.29
untitled.protein	256	307	untitled.rna	574	625	-	1.27\	1.27
untitled.protein	256	307	untitled.rna	349	400	-	1.26\	1.26
untitled.protein	31	82	untitled.rna	126	177	-	1.24\	1.24
untitled.protein	6	57	untitled.rna	126	177	-	1.13\	1.13
untitled.protein	51	102	untitled.rna	126	177	-	1.13\	1.13
untitled.protein	1	52	untitled.rna	249	300	-	1.12\	1.12
untitled.protein	1	52	untitled.rna	299	350	-	1.12\	1.12
untitled.protein	101	152	untitled.rna	124	175	-	1.12\	1.12
untitled.protein	256	307	untitled.rna	126	177	-	1.12\	1.12
untitled.protein	56	107	untitled.rna	126	177	-	1.11\	1.11
untitled.protein	1	52	untitled.rna	601	652	-	1.07\	1.07
untitled.protein	156	207	untitled.rna	124	175	-	1.07\	1.07
untitled.protein	176	227	untitled.rna	574	625	-	1.06\	1.06
untitled.protein	31	82	untitled.rna	124	175	-	1.04\	1.04
untitled.protein	176	227	untitled.rna	249	300	-	0.96\	0.96
untitled.protein	181	232	untitled.rna	624	675	-	0.96\	0.96
untitled.protein	1	52	untitled.rna	26	77	-	0.92\	0.92
untitled.protein	76	127	untitled.rna	124	175	-	0.92\	0.92
untitled.protein	126	177	untitled.rna	126	177	-	0.89\	0.89
untitled.protein	131	182	untitled.rna	124	175	-	0.88\	0.88
untitled.protein	256	307	untitled.rna	249	300	-	0.88\	0.88
untitled.protein	1	52	untitled.rna	499	550	-	0.87\	0.87
untitled.protein	81	132	untitled.rna	124	175	-	0.85\	0.85
untitled.protein	181	232	untitled.rna	349	400	-	0.85\	0.85
untitled.protein	51	102	untitled.rna	474	525	-	0.83\	0.83
untitled.protein	1	52	untitled.rna	226	277	-	0.78\	0.78
untitled.protein	56	107	untitled.rna	474	525	-	0.78\	0.78
untitled.protein	181	232	untitled.rna	476	527	-	0.78\	0.78
untitled.protein	101	152	untitled.rna	126	177	-	0.77\	0.77
untitled.protein	181	232	untitled.rna	249	300	-	0.75\	0.75
untitled.protein	131	182	untitled.rna	126	177	-	0.73\	0.73
untitled.protein	1	52	untitled.rna	1	52	-	0.64\	0.64
untitled.protein	1	52	untitled.rna	301	352	-	0.64\	0.64
untitled.protein	26	77	untitled.rna	124	175	-	0.62\	0.62
untitled.protein	126	177	untitled.rna	124	175	-	0.62\	0.62
untitled.protein	1	52	untitled.rna	661	37	back-splicing_junction	0.61\	0.61
untitled.protein	151	202	untitled.rna	124	175	-	0.61\	0.61
untitled.protein	1	52	untitled.rna	174	225	-	0.58\	0.58
untitled.protein	101	152	untitled.rna	474	525	-	0.58\	0.58
untitled.protein	1	52	untitled.rna	176	227	-	0.57\	0.57
untitled.protein	1	52	untitled.rna	126	177	-	0.49\	0.49
untitled.protein	1	52	untitled.rna	351	402	-	0.49\	0.49
untitled.protein	1	52	untitled.rna	376	427	-	0.48\	0.48
untitled.protein	251	302	untitled.rna	249	300	-	0.47\	0.47
untitled.protein	176	227	untitled.rna	301	352	-	0.45\	0.45
untitled.protein	1	52	untitled.rna	224	275	-	0.39\	0.39
untitled.protein	251	302	untitled.rna	624	675	-	0.39\	0.39
untitled.protein	6	57	untitled.rna	349	400	-	0.38\	0.38
untitled.protein	1	52	untitled.rna	24	75	-	0.37\	0.37
untitled.protein	1	52	untitled.rna	449	500	-	0.36\	0.36
untitled.protein	1	52	untitled.rna	426	477	-	0.35\	0.35
untitled.protein	251	302	untitled.rna	349	400	-	0.34\	0.34
untitled.protein	256	307	untitled.rna	301	352	-	0.32\	0.32
untitled.protein	51	102	untitled.rna	249	300	-	0.29\	0.29
untitled.protein	56	107	untitled.rna	249	300	-	0.29\	0.29
untitled.protein	256	307	untitled.rna	101	152	-	0.29\	0.29
untitled.protein	1	52	untitled.rna	599	650	-	0.26\	0.26
untitled.protein	6	57	untitled.rna	476	527	-	0.23\	0.23
untitled.protein	101	152	untitled.rna	249	300	-	0.23\	0.23
untitled.protein	181	232	untitled.rna	301	352	-	0.23\	0.23
untitled.protein	251	302	untitled.rna	476	527	-	0.19\	0.19
untitled.protein	181	232	untitled.rna	99	150	-	0.18\	0.18
untitled.protein	256	307	untitled.rna	299	350	-	0.12\	0.12
untitled.protein	256	307	untitled.rna	424	475	-	0.12\	0.12
untitled.protein	1	52	untitled.rna	251	302	-	0.08\	0.08
untitled.protein	176	227	untitled.rna	299	350	-	0.08\	0.08
untitled.protein	176	227	untitled.rna	601	652	-	0.07\	0.07
untitled.protein	6	57	untitled.rna	301	352	-	0.05\	0.05
untitled.protein	131	182	untitled.rna	249	300	-	0.05\	0.05
untitled.protein	1	52	untitled.rna	199	250	-	0.04\	0.04
untitled.protein	51	102	untitled.rna	624	675	-	0.03\	0.03
untitled.protein	101	152	untitled.rna	624	675	-	0.02\	0.02
untitled.protein	251	302	untitled.rna	301	352	-	0.01\	0.01
untitled.protein	1	52	untitled.rna	349	400	-	2.1\	2.1
untitled.protein	1	52	untitled.rna	526	577	-	0.7\	0.7
untitled.protein	1	52	untitled.rna	636	12	back-splicing_junction	0.5\	0.5
untitled.protein	181	232	untitled.rna	74	125	-	-7\
