# Supplementary material for: Targeting circGDI2 disrupt HNRNPC-mediated mPORCN stabilization and enhance LGK-974 anti-tumor therapy in hepatocellular carcinoma
Source: Mol Cancer. 2026 Mar 10;25:110. doi: 10.1186/s12943-026-02638-1 (PMC13088843; doi:10.1186/s12943-026-02638-1)
Supplement: Supplementary file 3 — Supplementary Material 3. [file 12943_2026_2638_MOESM3_ESM.xlsx]

## Sheet: sig_UP_genes
Geneid	SI1_1	SI1_2	SI1_3	SINC_1	SINC_2	SINC_3	logFC	logCPM	F	PValue	FDR
HES2	1.7284	1.33954	1.56207	0.995008	0.81043	1.04754	0.701986	2.76299	34.9763	8.71191e-07	2.61689e-05
XKR8	0.540492	0.563047	0.635698	0.363215	0.357209	0.340993	0.715435	0.409932	8.73693	0.00544431	0.0307139
CYR61	2.91165	2.66825	2.64133	1.55228	2.11752	1.60865	0.648166	2.47484	26.2415	1.00541e-05	0.000199754
TMEM56	1.02292	0.928139	0.761935	0.572043	0.603033	0.533536	0.673417	2.4589	28.48	5.19739e-06	0.000116134
RBM15	7.77793	7.10467	7.1352	4.4268	5.15789	5.04058	0.597236	4.83544	87.605	3.17859e-11	3.70966e-09
HIST2H4A	5.48964	4.35761	4.72005	2.90764	2.8436	2.57602	0.812032	2.84743	52.9225	1.34913e-08	7.6951e-07
HIST2H2AA3	12.1522	10.6707	11.9603	7.75805	6.94067	8.23467	0.605087	2.413	24.119	1.92493e-05	0.000334154
RPTN	0.815967	0.76102	0.900807	0.711841	0.411807	0.422232	0.677951	1.29015	11.8405	0.00148031	0.0112016
SLAMF7	0.805244	0.826451	0.665215	0.401982	0.529367	0.516088	0.674689	1.61307	17.1173	0.000198654	0.00225092
CCDC190	0.509124	0.431876	0.284071	0.271235	0.16396	0.180596	0.989578	0.461046	14.1826	0.000586774	0.00538243
RGL1	0.673713	0.532063	0.585485	0.309876	0.40018	0.396706	0.70261	1.38165	15.7684	0.00032395	0.00330403
HMCN1	0.907703	0.984639	1.00893	0.53759	0.61821	0.633498	0.704011	3.86313	74.4102	2.5205e-10	2.26279e-08
HLX	0.6642	0.668059	0.775008	0.497269	0.423167	0.468223	0.604444	1.74174	15.8355	0.000316056	0.00323782
DUSP10	0.72682	0.55742	0.747992	0.27352	0.373608	0.561721	0.756665	0.695452	9.93299	0.00325252	0.0206907
DISP1	1.64297	1.41008	1.68577	0.907071	0.960851	1.10068	0.68068	2.79717	36.5703	5.76951e-07	1.8947e-05
CASC10	0.334326	0.357285	0.243712	0.170374	0.24346	0.177723	0.670496	0.0231242	5.70839	0.0221867	0.08741
OTUD1	0.469373	0.608283	0.464467	0.271748	0.31551	0.336621	0.744754	0.326282	8.70618	0.00551865	0.0310798
AL356053.1	0.427447	0.402488	0.430539	0.265246	0.261795	0.169582	0.857579	-0.00203229	9.31067	0.00423711	0.0254246
CFAP70	1.00509	0.928476	0.7556	0.479505	0.534967	0.566647	0.773165	2.41342	36.1722	6.38931e-07	2.04512e-05
ANKRD1	9.53829	9.04203	8.96255	5.50003	5.51499	5.44843	0.747994	3.86286	92.9705	1.45902e-11	1.9083e-09
NFKB2	4.27464	3.53935	3.3176	2.18301	2.37939	2.34091	0.696063	3.75635	61.7295	2.504e-09	1.70362e-07
MUC6	0.496317	0.461287	0.442887	0.2778	0.251893	0.311362	0.739707	1.67572	22.7065	3.00699e-05	0.000481245
CYB5R2	0.113955	0.170376	0.155309	0.0550537	0.0569931	0.099744	1.05503	-0.0275567	12.5676	0.00109969	0.00888892
AP000769.1	130.489	87.7945	124.877	51.6488	47.8916	63.8999	1.07619	7.06901	25.1752	0.00632485	0.0343699
ANO1	0.857418	0.738568	0.71044	0.372309	0.474643	0.336585	0.970701	1.82402	39.0028	3.13162e-07	1.17027e-05
UCP3	0.366503	0.325264	0.266244	0.162263	0.125596	0.204526	0.959794	-0.087356	10.7664	0.0022848	0.0158941
KLRG1	0.570658	0.409981	0.356563	0.172569	0.240954	0.360025	0.797732	-0.0538994	6.99149	0.0120119	0.0557832
SOX5	0.196659	0.155843	0.119592	0.112133	0.0980254	0.0994239	0.612179	0.274312	5.52612	0.0242692	0.0934549
WNT10B	0.805612	0.52669	0.621809	0.284223	0.486579	0.316249	0.857533	0.461978	11.1816	0.00192447	0.013884
ASIC1	0.156681	0.254927	0.251352	0.0997165	0.099489	0.16281	0.874269	0.0418744	9.02735	0.00479289	0.0278185
NR4A1	0.177827	0.17886	0.138189	0.112672	0.126853	0.0712318	0.677182	0.0416577	5.77356	0.0214898	0.085441
SOCS2	0.464944	0.581609	0.554884	0.26466	0.361506	0.348929	0.723792	1.56062	18.6787	0.000114747	0.00144717
PLXNC1	0.407011	0.420148	0.407844	0.221691	0.31933	0.252276	0.647846	1.75769	17.4313	0.000177636	0.00205418
TMCC3	1.18657	1.1199	1.2295	0.718741	0.843884	0.741768	0.624684	2.67315	30.4131	2.99689e-06	7.32186e-05
SHISA2	0.833112	0.688983	0.53348	0.296102	0.342596	0.345213	1.06898	0.581067	20.0605	7.16217e-05	0.000985171
THBS1	33.8403	32.3185	32.8179	20.5477	21.0386	21.4255	0.657292	7.95051	342.837	4.15998e-20	7.8894e-17
AC023908.1	1.01176	0.734962	0.655591	0.475938	0.539339	0.588406	0.589622	-0.00865726	4.39292	0.043105	0.139801
PRTG	0.072702	0.0786087	0.0823017	0.058139	0.0485824	0.0428095	0.643733	-0.0279091	5.36767	0.0262525	0.0982957
LIPC	0.48516	0.452023	0.436224	0.240234	0.231012	0.205489	1.0243	0.861876	24.3919	1.76829e-05	0.000310875
GPRC5B	6.41708	5.44387	5.59052	2.84304	2.45352	2.75523	1.12028	4.82638	265.726	2.32408e-17	1.4692e-14
ZNF267	5.53902	5.32313	5.58421	3.44134	3.67024	3.25337	0.672131	4.82434	119.28	4.87794e-13	1.00011e-10
FA2H	1.29183	1.28309	0.922312	0.584896	0.415025	0.348643	1.37387	1.4295	50.9632	2.19676e-08	1.16536e-06
FGF11	0.299711	0.239248	0.239898	0.165602	0.127161	0.214764	0.619478	0.31573	5.74487	0.0217937	0.0863643
TBC1D3	1.21913	1.31657	1.34709	0.784771	0.976289	0.717869	0.654454	1.15794	12.0156	0.00137096	0.0105794
FAM187A	0.750071	0.692843	0.645892	0.446447	0.409165	0.49575	0.632229	1.02317	10.5604	0.00248962	0.0169232
SLC16A6	0.273806	0.354082	0.228109	0.134933	0.134043	0.281507	0.641176	0.00398426	4.52974	0.0401913	0.132967
ZNF490	0.193676	0.292202	0.332196	0.167028	0.188049	0.163673	0.660891	0.193968	6.03942	0.018883	0.0779916
MAST1	0.182359	0.228254	0.229375	0.137252	0.0999872	0.147149	0.734312	0.2211	7.83362	0.00815325	0.0414826
MIR1199	0.629808	0.633467	0.740747	0.169294	0.36999	0.397343	1.10836	0.259592	15.8579	0.000313474	0.0032157
ARHGAP33	0.38252	0.39993	0.486899	0.265174	0.300115	0.163004	0.806511	0.844526	13.0215	0.000919418	0.00773249
NPAS1	0.553687	0.391895	0.432637	0.173638	0.200283	0.332068	0.969365	-0.0803991	10.4334	0.00262562	0.0176237
HSD17B14	7.64679	4.9889	6.46578	4.08319	3.61198	3.4683	0.778985	2.70129	35.5543	1.51695e-06	4.13941e-05
ZNF784	1.15777	0.828089	1.32389	0.459904	0.555456	0.757487	0.906234	0.837515	15.8593	0.00031331	0.0032157
OSR1	0.508644	0.586835	0.672288	0.365941	0.466525	0.352362	0.584356	1.40841	10.9125	0.00215043	0.0151642
GCKR	2.13748	2.22607	2.00921	1.14007	1.18524	1.24706	0.840701	2.39331	47.3678	4.43327e-08	2.12853e-06
RASGRP3	0.0976301	0.100592	0.0784187	0.0358445	0.053857	0.0771181	0.738024	-0.199329	5.73644	0.0218838	0.086554
SLC9A4	1.01688	1.11793	1.02217	0.595153	0.632114	0.435158	0.930629	1.86277	37.0482	5.10844e-07	1.73003e-05
SULT1C2	7.53981	6.74663	5.44004	4.38898	4.24188	4.05241	0.642722	5.50509	30.1247	0.00120623	0.0095616
POTEI	0.241259	0.28816	0.248287	0.148955	0.139517	0.184977	0.719271	0.597689	9.8768	0.0033223	0.0210288
NEB	0.158498	0.162033	0.180942	0.0994114	0.0765758	0.127499	0.726856	2.05169	23.1581	2.67912e-05	0.000436602
CCDC148	0.838241	0.829059	0.589483	0.387741	0.387794	0.315346	1.0533	1.11146	27.811	6.31391e-06	0.000136072
ABCB11	0.334078	0.273985	0.275048	0.164406	0.184936	0.242113	0.584382	0.395336	5.52306	0.0243059	0.0935725
DHRS9	5.65494	5.55998	6.212	3.36749	3.36044	3.77602	0.735828	4.12829	94.9999	1.09609e-11	1.48481e-09
ZNF804A	0.473765	0.385752	0.348261	0.169799	0.220337	0.188194	1.06963	0.529385	19.878	7.61656e-05	0.00104013
2024-03-04	0.583426	0.5449	0.465632	0.347259	0.348862	0.292127	0.694597	0.972439	12.058	0.00134777	0.0104585
SLC19A3	0.397439	0.294815	0.153381	0.140218	0.183867	0.180395	0.754725	0.320972	6.98805	0.0124518	0.0573526
FBXO36	0.315412	0.344244	0.262442	0.265174	0.151782	0.19758	0.58212	0.0896508	4.43428	0.0421874	0.137649
MYL9	2.44942	2.54861	2.39522	1.64225	1.13848	1.16048	0.908061	2.42616	46.9707	4.8418e-08	2.29562e-06
PARD6B	4.59353	4.21454	4.70428	2.95137	2.94864	3.16114	0.582075	4.15517	63.2252	1.79336e-09	1.27144e-07
A4GALT	2.33889	1.43863	1.62937	1.28642	0.823087	1.14768	0.732124	2.105	16.9318	0.000490693	0.00463441
DOCK3	0.704574	0.745165	0.690865	0.452345	0.413468	0.457019	0.698622	2.34974	32.0787	1.88999e-06	4.9525e-05
CACNA2D3	0.617926	0.54739	0.542578	0.421346	0.361344	0.356068	0.587855	1.1798	10.1089	0.00301045	0.0194608
PLCXD2	0.764083	0.614224	0.707402	0.380245	0.548957	0.463237	0.592346	2.38886	19.7545	7.94139e-05	0.00107866
BOC	0.233221	0.226843	0.213639	0.103681	0.123835	0.155941	0.819488	0.899768	15.4689	0.000361823	0.00363067
AGTR1	2.55762	2.14373	2.1151	1.60416	1.40078	1.4866	0.606038	2.72279	28.1984	5.6395e-06	0.000123395
IGSF10	0.0948176	0.106722	0.102226	0.0679661	0.0603438	0.0708977	0.610433	0.0477037	5.1549	0.0291981	0.105654
CLDN1	0.722753	0.625179	0.624797	0.421584	0.326935	0.226977	1.01589	0.885918	21.3702	4.63568e-05	0.000691569
SLIT2	0.258965	0.211118	0.246871	0.097455	0.100888	0.144462	1.06848	0.815864	23.7744	2.14394e-05	0.00036344
NIPAL1	1.40713	1.45091	1.20677	0.774325	0.937118	0.93366	0.627538	2.75037	30.2574	3.1308e-06	7.62448e-05
KDR	6.05287	6.1476	5.65458	3.91181	3.83539	3.9062	0.621059	4.94584	114.324	8.82985e-13	1.61405e-10
AFP	0.706743	0.751703	0.660449	0.34392	0.534492	0.414561	0.722652	0.923633	12.0843	0.00133364	0.010371
RASGEF1B	0.19759	0.169973	0.214048	0.0782714	0.12295	0.122471	0.854365	0.65997	13.6292	0.000725705	0.00638284
FAT4	0.20936	0.194379	0.154136	0.0939389	0.0860942	0.113796	0.928961	1.25123	24.2169	1.86712e-05	0.000327113
ANKRD33B	1.20424	1.23574	1.17805	0.651774	0.612064	0.58959	0.969523	3.16272	100.756	4.98683e-12	7.34565e-10
PLK2	21.0885	17.916	17.3999	10.4112	10.7146	10.1791	0.855306	6.12408	223.599	1.35476e-13	3.28827e-11
GCNT4	0.238337	0.230133	0.264901	0.0986611	0.176418	0.130985	0.863369	0.137652	9.98713	0.00316995	0.0202503
CDKL3	0.528276	0.679425	0.66844	0.448122	0.418455	0.322966	0.659912	0.687246	8.63352	0.00569862	0.0317983
EDN1	4.23226	3.51027	4.20813	2.49932	2.55707	2.50489	0.665926	2.73342	35.0451	8.55665e-07	2.59643e-05
HIST1H1C	40.4952	34.4259	40.444	25.9937	23.5714	26.5484	0.604747	4.35958	67.1967	8.93817e-10	7.1e-08
HIST1H2AC	3.74578	4.0549	3.78956	2.32947	1.99072	2.46111	0.776716	2.3647	38.308	3.7209e-07	1.34094e-05
HIST1H2BD	6.50463	3.88265	4.78597	2.57367	2.31238	2.74435	0.9957	1.74598	33.9932	1.3618e-06	3.79106e-05
HIST1H2BJ	6.01945	5.38171	6.05139	3.90654	3.81043	3.14517	0.688793	2.17815	26.1817	1.02366e-05	0.000201178
HIST1H2BN	0.227186	0.218782	0.228829	0.118239	0.129204	0.109107	0.923771	-0.0147251	11.153	0.00194722	0.0140032
PRDM1	0.340855	0.351197	0.402118	0.148608	0.213671	0.244765	0.857779	0.886479	16.0642	0.000290649	0.003037
KPNA5	0.57044	0.587748	0.713536	0.368692	0.386197	0.36639	0.744449	2.51886	37.3688	4.70999e-07	1.62409e-05
TCF21	0.226874	0.292554	0.287363	0.180608	0.203338	0.137017	0.635572	0.0783279	5.41378	0.0256577	0.0967434
CYP2W1	0.41053	0.374505	0.334061	0.116768	0.333714	0.243609	0.706477	-0.177269	4.99058	0.0317193	0.112414
HDAC9	2.27032	2.1664	2.11786	1.30554	1.29722	1.29392	0.755838	4.87506	164.316	4.64487e-15	1.60163e-12
DNAH11	0.142318	0.163118	0.132839	0.0731747	0.0731558	0.073083	1.00197	0.847788	23.0336	2.70913e-05	0.000439604
NPC1L1	0.614981	0.796008	0.71071	0.431565	0.399036	0.415551	0.771243	1.58146	22.638	3.07365e-05	0.000489332
CCDC146	0.219779	0.286775	0.24452	0.184417	0.116026	0.10493	0.883903	-0.135396	8.71369	0.00550039	0.031
TFPI2	0.685969	0.659957	0.7878	0.411539	0.398602	0.351237	0.880127	0.593829	14.8403	0.000457444	0.00438153
NAT16	0.335119	0.343945	0.316728	0.173728	0.0984353	0.241629	0.950724	0.0353513	10.6138	0.00243477	0.0166698
SPDYE2	0.766634	0.629722	0.736368	0.540943	0.394074	0.388724	0.687241	0.315839	7.30712	0.0103745	0.0498109
LSMEM1	3.44209	2.68132	3.39519	1.93148	1.9741	2.34558	0.61231	2.77657	27.3281	7.27605e-06	0.00015375
TFEC	0.343028	0.237202	0.242702	0.190177	0.122799	0.17734	0.747035	0.959009	12.1388	0.00130476	0.010204
PPP1R3B	3.00221	3.18101	3.14155	1.84563	2.12047	2.08268	0.631207	3.89041	63.9574	1.5666e-09	1.13724e-07
FAM110B	0.208882	0.290901	0.275598	0.216674	0.165187	0.110382	0.653837	0.131189	5.46693	0.0249903	0.0950257
TOX	0.493472	0.296514	0.342961	0.319558	0.237188	0.188684	0.604498	0.428404	5.39899	0.0258469	0.097169
ZNF704	0.412781	0.331789	0.304988	0.207451	0.244826	0.183507	0.730779	2.08991	25.208	1.37527e-05	0.00025508
PAG1	2.45699	2.36255	2.20723	1.54104	1.4963	1.59337	0.607096	4.4233	81.0139	8.68134e-11	8.78089e-09
PGM5	0.199646	0.147018	0.157765	0.0972685	0.051312	0.125955	0.873592	0.022801	8.70084	0.00553167	0.0311416
DIRAS2	0.593217	0.630759	0.662825	0.37207	0.29622	0.282773	0.988986	1.17762	27.3172	7.29955e-06	0.000154032
HABP4	40.038	37.2901	39.263	25.3496	25.1103	23.1633	0.668792	7.00749	242.612	1.12752e-17	8.05027e-15
ABCA1	0.793067	0.910287	1.04902	0.399397	0.589909	0.721081	0.695033	3.08172	12.7661	0.00664223	0.0356477
FNBP1	18.5201	17.619	17.2638	11.1329	10.9447	11.247	0.685938	6.57682	256.142	4.7483e-18	3.98666e-15
AC007325.2	0.561412	0.453954	0.351191	0.289983	0.237657	0.334901	0.665931	-0.0808201	5.26605	0.0276168	0.101601
RP11-474O21.5	4.52751	4.86255	4.02761	3.89856	2.68229	2.3346	0.588793	0.41888	5.50695	0.0245003	0.0941059
SCARNA17	1.74473	0.915584	1.67845	0.428208	0.779867	0.856134	1.0799	-0.336489	10.2888	0.0027902	0.0184779
Metazoa_SRP	0.433512	0.29915	0.496966	0.159011	0.193503	0.2655	0.999852	3.89466	11.3991	0.0251363	0.0954612
RP11-69E11.4	0.467349	0.269851	0.427522	0.195416	0.320309	0.161378	0.793152	-0.020911	6.9104	0.012476	0.057429
NSRP1P1	0.84443	1.00662	1.09433	0.794449	0.643056	0.399012	0.681254	0.484278	7.26285	0.010589	0.0505684
MIR137HG	0.326192	0.27045	0.358375	0.22809	0.176736	0.147083	0.790766	0.639122	11.5597	0.0016487	0.0122318
RP11-404E16.1	3.76085	3.7827	3.00466	2.83991	1.78057	2.23395	0.620884	0.682633	7.42109	0.00984373	0.0479914
TGFB2-AS1	63.1679	61.7661	59.0892	31.6597	34.6447	37.7832	0.828595	4.74272	162.933	5.27151e-15	1.77732e-12
CH17-360D5.2	0.536571	0.269844	0.408629	0.141347	0.231684	0.189571	1.11923	-0.360827	11.24	0.00187881	0.0136259
RP11-574K11.29	1.22156	1.04994	1.21142	0.961193	0.685001	0.653904	0.597511	0.263841	5.35585	0.0264074	0.0986588
RNU2-2P	3.88107	7.80724	6.84706	2.86892	2.56499	6.2574	0.665967	0.0167719	4.26186	0.0476709	0.150118
MALAT1	375.039	253.685	365.424	146.264	138.801	182.695	1.09428	11.06	26.3725	0.00579903	0.0322164
RP11-347E10.1	1.32203	1.67066	1.39542	0.637835	1.04548	0.665347	0.911466	-0.114122	9.5276	0.00385823	0.0235941
RP11-356J5.12	0.379864	0.339619	0.456084	0.218399	0.195262	0.248531	0.829881	0.663582	13.4797	0.00076895	0.00667516
LINC01559	1.19212	1.07779	1.28198	0.781311	0.647213	0.749286	0.708368	1.93367	24.179	1.88926e-05	0.000330229
RP11-282K24.3	0.216078	0.148182	0.227426	0.0462019	0.0706813	0.0481948	1.84298	-0.46185	27.5654	6.78532e-06	0.000144183
RP5-1057I20.4	0.833454	1.03554	1.23614	0.553499	0.504025	0.938232	0.638761	-0.0473364	4.678	0.0371971	0.126169
RP11-161H23.10	4.5829	3.04558	3.5373	2.84876	1.76681	2.77086	0.596111	1.03823	7.98707	0.00760639	0.0394544
RP11-133N21.10	2.5081	2.84969	3.91954	1.22352	1.76674	1.09397	1.19018	0.391506	20.2137	6.80299e-05	0.000944695
RP3-405J10.3	0.202224	0.242948	0.254362	0.116266	0.115499	0.0826919	1.15297	-0.243509	14.2125	0.000580116	0.00533749
CLIP1-AS1	2.19523	1.56031	1.8224	0.881192	1.32401	1.20645	0.719106	1.4602	15.9426	0.000303876	0.00313207
RP13-554M15.7	1.00401	0.820496	0.910555	0.495905	0.548347	0.517296	0.814703	1.61533	26.2529	1.00198e-05	0.000199754
AL163953.2	1.53158	1.8339	1.65125	0.754771	0.899747	1.07363	0.8834	-0.0211719	9.92043	0.00326114	0.0207359
CHMP4BP1	5.44797	3.75875	5.0043	2.03326	3.28645	2.82795	0.812804	1.15837	16.1484	0.000281855	0.00295733
LINC00216	1.59881	1.53715	1.42761	0.729969	0.507606	0.738382	1.20511	0.351429	22.2862	3.44148e-05	0.00054052
RP11-638I2.6	2.44497	1.65226	1.69056	1.4736	1.09969	1.19974	0.618016	0.209911	5.39636	0.0258807	0.0971937
RP11-632K20.6	1.32162	1.4981	1.70555	1.06577	0.797973	0.864688	0.729382	0.655263	10.3998	0.00266296	0.0178456
RP11-128A17.1	3.53753	2.35293	3.34698	1.82511	1.75974	2.4078	0.627757	0.295473	5.82934	0.0209122	0.0838237
CTD-2033D15.3	10.1167	11.5423	9.68618	5.91907	6.00231	7.16228	0.721327	2.15818	28.3276	5.43191e-06	0.000119851
PIN4P1	4.01128	4.16907	3.71531	2.32721	2.33684	2.62442	0.710775	0.395383	8.56726	0.00586822	0.0324303
CTD-2184D3.5	6.33719	4.82244	3.13217	2.7457	2.18596	3.10963	0.833157	1.27184	15.2326	0.000502915	0.00473045
RP11-461A8.4	1.09071	0.922514	1.32657	0.489753	0.790017	0.900119	0.623976	0.0419955	4.80929	0.0347796	0.120474
CRYM-AS1	0.673703	0.582327	0.758327	0.505081	0.465347	0.371907	0.588083	0.542131	6.26262	0.0169581	0.0721909
RP11-432I5.8	3.2369	4.79788	4.10262	2.24391	2.69722	2.87572	0.641285	1.39371	12.6058	0.00108314	0.00880907
RP11-252A24.2	0.338884	0.292159	0.284698	0.13664	0.213302	0.230768	0.666586	0.00434409	5.60464	0.0233471	0.0906635
UBE2SP2	2.98304	2.51816	2.63137	1.70393	2.08101	1.25465	0.697114	0.188308	6.86069	0.0127701	0.0583402
SNORD3A	11.6654	7.65705	13.9151	2.38741	3.23182	5.79851	1.54892	2.3851	13.8397	0.0167291	0.0714535
MGC16275	0.556362	0.475127	0.583371	0.22715	0.377719	0.319364	0.814684	0.154783	9.09605	0.00465132	0.0272384
RP11-737O24.3	2.44805	2.22398	1.78793	1.50448	1.0757	1.49187	0.667463	1.26649	12.453	0.00115091	0.00920004
GATA6-AS1	0.609943	0.525846	0.911674	0.409887	0.462829	0.413314	0.674313	0.0845126	5.83789	0.0208252	0.0836153
RP11-800A18.4	44.3526	41.5867	43.365	28.1821	29.0608	29.3977	0.58354	4.17818	67.8921	7.70527e-10	6.31916e-08
RP11-800A18.3	0.966129	0.681481	0.942621	0.460374	0.567566	0.566428	0.706656	0.602219	9.24617	0.00435729	0.0259658
CTD-3113P16.5	2.19806	2.11257	1.96048	1.37864	1.30563	1.15049	0.712037	-0.0539911	6.53491	0.014892	0.0656808
CTB-50E14.5	5.13745	5.7507	5.20182	3.35217	3.32231	4.06601	0.588038	1.53807	13.049	0.00090957	0.00768103
CTC-512J12.4	3.36696	3.80404	3.98716	2.08285	1.6596	3.48536	0.628555	0.854385	7.57881	0.00919676	0.0456305
PLA2G4C-AS1	1.33434	1.34209	1.40441	1.05564	0.623536	0.833322	0.695361	0.0165039	6.20738	0.0174139	0.0735877
AC009228.1	4.0535	2.88791	3.95431	2.58211	2.25726	2.03048	0.667914	0.9298	10.2936	0.00278458	0.0184568
RP11-181E10.3	1.1433	1.34758	0.864064	0.907559	0.477498	0.753858	0.646482	0.49714	6.46755	0.0153765	0.0670575
APCDD1L-AS1	1.50058	1.2829	1.59944	0.998314	0.853986	1.04138	0.602567	2.5934	24.8955	1.51357e-05	0.000275346
RNA5-8S5	11.3555	8.17992	11.3301	4.11054	4.69188	7.3233	0.943485	3.26502	12.9789	0.014935	0.0658129
SNRK-AS1	1.23547	2.4498	1.99801	1.06272	1.48788	1.24713	0.589009	0.300921	4.77244	0.0354402	0.121982
KIF9-AS1	0.340525	0.271828	0.283693	0.162727	0.116693	0.212183	0.865714	0.2427	10.5113	0.00254129	0.0171744
RP11-757F18.5	0.533042	0.591128	0.506372	0.450057	0.309129	0.254855	0.682209	-0.1425	5.32391	0.0268308	0.0996759
B4GALT4-AS1	4.0393	4.06277	4.05679	2.74714	2.10134	2.81788	0.666637	0.885568	10.5182	0.00253402	0.0171421
CPHL1P	0.343212	0.3249	0.277027	0.24059	0.207555	0.178319	0.595395	0.113596	4.97686	0.0319402	0.112986
PA2G4P4	1.59026	1.37422	2.18979	1.07469	0.851982	1.36284	0.64873	0.775224	8.01097	0.00752482	0.0391477
RP11-477G18.2	3.63706	3.06267	4.00415	2.06899	1.91304	2.40726	0.745596	-0.0872094	6.86092	0.0127687	0.0583402
RP11-404J23.1	2.01383	0.988061	1.97139	0.369684	1.2624	1.01228	0.927761	-0.453202	6.27541	0.0174652	0.0737013
CTD-2589H19.6	8.09964	7.60807	7.57779	4.97519	4.43873	4.30293	0.767303	2.29913	36.7049	5.57464e-07	1.84669e-05
CTD-2031P19.5	10.231	11.3262	10.5632	6.62532	6.8641	7.26969	0.635434	2.82037	35.5492	7.50423e-07	2.32831e-05
HMGB1P21	4.10103	4.03319	3.79844	2.65794	1.6396	1.8782	0.947572	0.850862	19.1998	9.59118e-05	0.00124587
CTC-546K23.1	0.790427	0.883355	0.662812	0.394773	0.511642	0.56503	0.675071	0.822697	9.8497	0.00336089	0.0212297
RP11-506K6.4	0.692142	0.629225	0.643813	0.250452	0.396834	0.365757	0.964686	0.0482108	12.0911	0.00132999	0.0103556
PPIAP29	2.44053	1.81435	2.07482	1.29778	0.872701	1.56203	0.759893	-0.170717	6.41134	0.0157938	0.0684639
RP11-440G9.1	0.449961	0.35785	0.463068	0.246121	0.172126	0.19512	1.04595	-0.243733	11.7622	0.00151858	0.0114398
HNRNPH1P1	1.54155	1.46062	1.54047	1.05095	1.24028	0.745469	0.587492	0.626967	6.48016	0.0152845	0.0667522
AC007161.5	0.884841	0.676386	0.837766	0.466182	0.473029	0.555761	0.685764	0.0293024	6.26895	0.0169067	0.0720351
AC011738.4	0.708164	0.620961	0.420457	0.341666	0.326683	0.400954	0.71508	0.506559	8.49394	0.00606222	0.0332885
DTX2P1	0.761971	0.684866	0.650691	0.59485	0.183338	0.318209	0.921446	-0.114961	8.31779	0.00659006	0.035468
RP11-401L13.4	1.43347	2.52315	1.84403	1.26434	0.828955	1.58265	0.656022	-0.0216259	4.88105	0.0335313	0.11722
CTB-111H14.1	1.2843	1.17666	1.11233	0.646014	0.902016	0.786193	0.623274	1.06676	10.2285	0.002862	0.0188138
AC073130.1	0.992791	0.852936	0.872711	0.564309	0.414639	0.385667	0.99371	0.840476	21.3141	4.72177e-05	0.000703029
AC093673.5	2.41048	2.38339	3.57388	1.65281	1.9741	1.60382	0.682957	0.598214	8.35607	0.00644585	0.0348775
CTD-2373N4.3	0.781945	1.02993	0.632282	0.402863	0.689047	0.456783	0.67023	-0.00834112	5.29761	0.027185	0.100377
RP11-419L20.2	2.25314	2.26623	2.15315	1.36272	0.716972	2.15857	0.653911	0.885237	6.59643	0.0165387	0.070823
LINC00536	6.04821	6.47901	7.12515	4.12657	4.51938	4.54585	0.581209	3.88433	51.4286	1.84366e-08	9.98058e-07
RP11-536K17.1	23.0876	21.6864	28.522	9.96298	13.4861	16.4317	0.886134	3.39076	28.4313	0.000370782	0.00370342
RP11-383J24.1	1.81922	1.73348	2.46344	0.81073	1.03357	1.87933	0.696627	-0.0803249	5.15728	0.0291632	0.10565
RMRP	7.31011	3.77565	4.67648	1.85876	3.45295	4.84735	0.64522	0.269568	4.59879	0.0402986	0.133205
RP11-460N11.2	0.549698	0.463453	0.557391	0.289002	0.307494	0.349069	0.736499	0.506987	9.80881	0.00342005	0.0215159
RP11-526D8.11	1.87557	1.48741	2.15292	1.08588	1.03826	1.13272	0.762043	0.165838	8.25799	0.00673452	0.0359775
RP11-339B21.10	3.68959	4.81782	3.46399	3.53211	2.12948	1.84223	0.670642	0.465517	6.76664	0.013347	0.0604608
AC004383.3	2.47339	3.68557	3.77102	1.20659	2.5428	1.79805	0.851512	-0.336456	6.82541	0.0129833	0.0591895

## Sheet: sig_DOWN_genes
sig_UP_genes	SI1_1	SI1_2	SI1_3	SINC_1	SINC_2	SINC_3	logFC	logCPM	F	PValue	FDR
ZCCHC17	25.5786	28.2362	30.6212	68.0579	66.577	69.7221	-1.26963	6.53154	638.04	3.11891e-22	2.36601e-18
PEF1	1.52166	1.86529	2.17769	3.75793	4.03311	3.23168	-0.980563	2.63742	59.8286	3.65145e-09	2.39826e-07
LSM10	1.62811	1.97576	1.87587	3.82935	3.89339	4.064	-1.09861	2.12851	65.0766	1.27663e-09	9.58862e-08
INPP5B	0.501028	0.468156	0.521724	0.769816	0.743677	0.884487	-0.679915	2.5493	32.7598	1.57062e-06	4.26287e-05
ACOT11	0.105703	0.0490693	0.0697318	0.165744	0.0752323	0.154274	-0.81403	0.100251	6.86204	0.0133764	0.0605268
DHCR24	25.3345	28.5643	26.6045	40.1156	44.9631	41.7665	-0.650012	7.19846	211.8	2.09984e-15	8.61047e-13
HOOK1	0.470099	0.563457	0.503951	0.855064	0.918254	0.692028	-0.67466	2.19196	23.9302	2.04181e-05	0.000348855
LEPROT	0.530803	0.757611	1.01969	1.85486	1.94892	1.88029	-1.29569	2.81703	72.493	8.08202e-08	3.54394e-06
LEPR	0.0232845	0.0632333	0.088662	0.100769	0.105327	0.155388	-1.03982	0.101106	10.3458	0.00312978	0.020065
CGN	8.01116	7.67534	7.91095	13.3573	14.2175	12.7985	-0.768841	6.14145	263.673	2.98507e-18	2.66408e-15
B4GALT3	1.23184	1.13632	1.03659	1.72239	1.5113	1.91691	-0.591657	2.48931	22.954	2.77859e-05	0.000448954
GPR161	0.106143	0.0901527	0.109235	0.104299	0.143071	0.222225	-0.610247	0.588437	5.86004	0.0206616	0.0831284
KIAA0040	0.276756	0.233825	0.284817	0.328072	0.597496	0.521483	-0.850638	0.878277	14.3981	0.000540588	0.00502561
PAPPA2	0.208308	0.326458	0.176984	0.40335	0.438267	0.37796	-0.76899	1.84001	20.4209	8.47708e-05	0.00113139
STX6	2.37481	2.56539	2.25469	4.03395	3.93742	3.93919	-0.721483	4.37151	110.25	1.45974e-12	2.57525e-10
C1orf106	0.81678	1.07241	1.25834	2.02002	1.93584	1.82396	-0.87245	3.02223	55.803	1.8811e-08	1.00848e-06
KLHL12	3.80868	3.76334	4.48724	6.28296	5.85418	6.27601	-0.605725	4.17886	63.3055	1.76689e-09	1.25855e-07
SYT14	0.072241	0.0535395	0.0586937	0.128776	0.0899037	0.0671654	-0.628522	0.203385	5.15632	0.0291773	0.105651
SERTAD4	0.242129	0.194829	0.149509	0.437372	0.273816	0.327921	-0.820873	0.628663	11.5179	0.00167701	0.0124115
BPNT1	1.87949	1.89896	1.71543	2.84839	2.65791	2.85441	-0.600171	2.85931	32.4501	1.70815e-06	4.55019e-05
MARC1	0.61482	0.532105	0.626843	0.812492	0.967219	0.914892	-0.595915	2.79741	28.6525	4.9447e-06	0.000111378
SDE2	7.81246	8.22629	8.4033	13.5847	15.0021	13.6805	-0.784052	5.46774	214.814	7.67024e-17	4.15618e-14
SCCPDH	2.65485	2.95751	2.87369	4.25904	3.97985	4.54656	-0.586124	3.1606	36.2015	6.34146e-07	2.0384e-05
MPP7	0.0729796	0.133854	0.0839414	0.157514	0.194189	0.214865	-0.950186	-0.0948649	10.0873	0.00303812	0.0196229
ALOX5	0.227127	0.285558	0.277569	0.580951	0.452407	0.424904	-0.879525	0.544777	13.6012	0.000733607	0.00644487
ARHGAP22	0.171735	0.29443	0.164687	0.374548	0.37317	0.218334	-0.607793	0.897992	6.4381	0.0165766	0.0709252
SLC16A9	0.155416	0.24049	0.147639	0.326176	0.381006	0.293315	-0.869511	0.257802	10.6702	0.0023781	0.0163556
UNC5B	0.224458	0.233547	0.0995673	0.334963	0.294414	0.227877	-0.612641	0.743364	5.99144	0.0202345	0.0819753
ERLIN1	2.98934	3.42967	3.18932	5.22059	4.66624	4.56207	-0.583895	4.54232	70.8011	4.63971e-10	3.9547e-08
PDCD11	12.251	12.1851	12.7702	19.9914	21.5652	21.0297	-0.744312	6.94018	323.465	1.08284e-19	1.82543e-16
SFXN4	0.623595	1.32571	1.10849	2.06673	1.58816	2.25324	-0.946735	1.51527	21.6332	8.28811e-05	0.00111182
IGF2	0.093056	0.0850879	0.121885	0.206932	0.200032	0.14944	-0.884118	-0.0747266	9.23602	0.00437654	0.02606
MUC15	0.89931	0.880732	0.917388	1.40271	1.35438	1.5329	-0.663489	1.98951	22.9993	2.73883e-05	0.000443475
SLC1A2	0.0601155	0.0691026	0.0287238	0.121194	0.101533	0.126422	-1.13342	0.141251	15.4899	0.000359029	0.00360741
EXT2	2.51422	3.05273	3.13381	6.37057	6.26113	6.96485	-1.16607	4.64454	261.278	2.08764e-17	1.37712e-14
C11orf31	2.66467	2.63394	2.64773	4.04138	4.10917	3.92263	-0.597416	2.95521	34.9916	8.67713e-07	2.61209e-05
CDC42BPG	1.23449	1.11532	1.16792	2.13131	2.23546	2.19349	-0.892652	3.36979	96.7853	8.55383e-12	1.1939e-09
CDCA5	10.7247	10.4478	10.5234	16.8609	17.003	17.1381	-0.680463	5.75919	208.402	1.23035e-16	6.43686e-14
FAM89B	2.39686	2.33773	2.87779	4.57832	5.63761	5.34605	-1.02424	2.50906	66.6535	9.60501e-10	7.47319e-08
RHOD	1.6952	1.0104	1.57228	1.96897	1.95793	2.50576	-0.58192	1.21172	8.64642	0.00566621	0.031677
C11orf24	13.7735	15.2295	14.7987	24.7319	24.5004	23.9756	-0.735487	6.05493	242.082	1.16732e-17	8.05027e-15
CCDC82	9.77428	10.8029	10.1465	16.6171	16.7834	16.4804	-0.693494	6.52467	248.217	7.84089e-18	5.9481e-15
VWA5A	0.103367	0.0998091	0.119144	0.221728	0.263545	0.267812	-1.21372	0.26824	21.7003	4.16128e-05	0.000629461
EI24	10.7371	12.8277	13.4543	36.4441	38.6153	36.9865	-1.59211	6.46654	677.433	4.97415e-16	2.35837e-13
CHEK1	5.00988	5.32727	5.28045	7.83912	8.57442	8.69626	-0.678871	5.47803	165.662	4.11038e-15	1.45029e-12
CCDC77	14.1749	16.9392	16.661	26.0997	25.8166	25.3132	-0.687461	6.23556	172.917	5.95556e-14	1.53149e-11
COPS7A	5.63847	5.36329	6.16155	9.02525	9.72236	8.3045	-0.650448	4.5239	85.0938	4.63069e-11	5.09107e-09
ARHGDIB	1.56177	1.57084	1.60726	3.05715	2.53787	2.4721	-0.762918	2.18803	32.1858	1.83557e-06	4.84335e-05
BCAT1	2.67105	3.05066	2.5221	3.94712	4.51196	4.03352	-0.593153	5.34868	90.834	2.20692e-10	2.00499e-08
ERGIC2	6.47547	7.3815	6.66409	9.93561	11.1	10.1992	-0.599831	5.65267	125.067	2.77613e-13	5.93231e-11
METTL7B	3.4807	4.49109	3.54591	5.85474	5.81938	5.79674	-0.59517	2.87611	29.3752	4.01905e-06	9.55754e-05
PAN2	1.315	1.3336	1.29349	2.0198	2.13989	1.98215	-0.633414	3.62227	57.864	4.98262e-09	3.16433e-07
PIP4K2C	2.6643	3.14793	2.84101	4.3337	4.81811	5.39483	-0.742689	3.6804	68.816	6.54867e-10	5.42931e-08
NUAK1	0.679994	0.702943	0.641485	1.13022	1.11075	1.20863	-0.762746	2.69195	46.9233	4.89317e-08	2.31172e-06
TRAFD1	3.81662	4.15644	4.19748	6.56191	6.54875	6.79879	-0.704476	4.40169	108.486	1.82264e-12	3.17852e-10
OASL	0.195717	0.272567	0.216911	0.453249	0.263119	0.517124	-0.844849	0.246445	9.29077	0.00427382	0.0255486
ORAI1	0.912912	1.08302	1.15631	1.67371	1.68454	1.4128	-0.592389	1.60671	13.4609	0.000774566	0.0067076
EEF1AKMT1	1.00836	1.11365	1.3633	2.69722	1.48384	2.40608	-0.917558	1.21292	19.397	9.79524e-05	0.00126912
F7	0.43252	0.364867	0.373326	0.616943	0.674159	0.588784	-0.675135	0.990353	11.7046	0.0015544	0.0116692
PNP	14.008	14.6555	16.6804	25.8943	25.968	28.3797	-0.817697	6.43764	225.121	1.19988e-13	2.98436e-11
RAB2B	1.32005	1.63015	1.35851	2.18026	2.14874	2.25991	-0.606898	2.72725	29.0601	4.39778e-06	0.000101336
DHRS1	0.238175	0.431205	0.256006	0.502929	0.478834	0.410348	-0.582872	0.993329	7.3591	0.0101287	0.0490656
NUBPL	0.502282	0.540283	0.603065	0.863064	0.857042	0.890022	-0.660018	2.44536	29.6532	3.71345e-06	8.92876e-05
CFL2	2.25691	2.63723	2.2847	6.3561	6.38446	6.52169	-1.41805	4.98744	524.596	3.29817e-23	5.00398e-19
GABRB3	0.554808	0.504337	0.559196	0.869949	0.752662	0.841986	-0.602212	3.25133	39.4546	2.80194e-07	1.06278e-05
ANXA2	58.5204	61.4405	60.2281	100.954	91.0474	93.8042	-0.660087	9.42033	341.79	3.58038e-19	4.52679e-16
STOML1	0.199931	0.168002	0.138038	0.288099	0.252374	0.238434	-0.616088	1.203	10.5662	0.00248361	0.016905
MEX3B	0.181997	0.195258	0.262217	0.399524	0.399155	0.392942	-0.891615	0.473985	13.5262	0.000755212	0.00660408
ARPIN	0.113981	0.133234	0.196559	0.405753	0.316702	0.296278	-1.19605	1.11156	32.1777	1.83959e-06	4.84554e-05
CHSY1	1.67759	2.14752	2.17769	2.9593	3.11615	3.0355	-0.596346	3.81309	46.9715	5.0399e-08	2.36735e-06
CDIP1	0.924248	1.14175	1.49378	1.99003	2.31488	2.36807	-0.90065	2.8757	48.6984	1.71611e-07	6.90633e-06
NAGPA	0.362068	0.427295	0.581279	0.84024	0.754383	0.762777	-0.77863	1.7951	23.4824	2.35017e-05	0.000389692
NOMO3	4.02524	4.32218	4.02395	6.88462	6.78625	6.50016	-0.699726	5.49011	183.216	8.95454e-16	4.11692e-13
NOMO2	6.91738	7.29037	7.58358	12.7375	12.7863	12.6643	-0.80375	6.08845	297.627	4.21782e-19	4.92252e-16
LYRM1	3.30102	3.83156	3.93556	5.43485	6.06009	5.23541	-0.589905	4.06236	54.6551	9.45446e-09	5.60324e-07
LAT	0.40638	0.553002	0.332114	0.708428	0.577524	0.668606	-0.592416	1.29863	9.71773	0.00355585	0.0221429
ARL2BP	3.62411	4.12707	3.89404	9.10769	9.66185	10.1034	-1.30366	3.87116	255.339	4.99252e-18	3.98666e-15
PLLP	0.561671	0.601579	0.574907	1.39962	1.4389	1.54639	-1.32852	3.16638	181.69	1.01729e-15	4.53953e-13
HSD11B2	0.376226	0.328621	0.458509	0.484363	0.763389	0.592704	-0.65061	0.474761	6.87907	0.0126605	0.0579267
ZNF19	0.0889656	0.092369	0.0826967	0.1404	0.141619	0.149272	-0.699594	0.170327	7.25989	0.0106035	0.0505898
SLC7A5	23.7963	29.3612	29.3357	42.0671	46.0831	46.3894	-0.699744	7.42312	61.114	0.000197019	0.00223741
RP11-566K11.2	7.70582	9.42924	9.18656	22.0093	20.4817	20.6282	-1.25684	5.37394	418.611	1.44519e-19	2.19265e-16
TUBB3	5.01998	6.3475	6.18715	14.6633	13.6947	14.029	-1.26678	5.4706	375.474	4.20722e-16	2.05909e-13
MYO1D	0.103466	0.0520337	0.0665501	0.100384	0.162879	0.126926	-0.79683	-0.17101	6.55287	0.0147656	0.0652561
CCT6B	0.122171	0.184321	0.176021	0.206892	0.301438	0.275764	-0.688961	-0.0478408	5.71608	0.0221032	0.0871264
PEX12	0.240593	0.335064	0.209508	0.522351	0.513715	0.672022	-1.11126	0.319622	17.8171	0.000154989	0.00184287
RASL10B	0.39311	0.486638	0.443461	0.668561	0.847142	0.734494	-0.757067	1.09815	15.3318	0.000380702	0.00378591
KRT15	0.974063	0.972243	1.01009	1.92376	1.68938	1.51782	-0.790859	3.27445	63.9877	1.55791e-09	1.13637e-07
C17orf53	0.67838	0.67346	0.61654	1.12726	0.996309	1.03754	-0.677772	1.39588	15.7879	0.000321638	0.00328391
FDXR	0.301598	0.251559	0.325524	0.553652	0.415936	0.555876	-0.791582	0.587618	11.4666	0.00171245	0.0126307
MYO15B	1.35474	1.348	1.30453	2.28561	2.12219	2.31293	-0.740614	4.51699	127.692	1.85883e-13	4.20928e-11
BIRC5	14.5176	16.7517	16.4759	28.0021	26.5039	26.7378	-0.761599	6.35889	242.993	3.05902e-17	1.78505e-14
CNDP2	8.74362	9.90468	9.56632	17.3057	17.4198	16.6728	-0.859707	7.29668	418.183	1.92728e-21	7.31017e-18
CRB3	1.29711	1.20429	1.06107	1.94003	2.00027	1.7789	-0.675476	1.33474	14.7348	0.000475958	0.00452458
ASF1B	1.58571	2.21902	1.52547	3.14586	3.60299	3.23645	-0.897951	2.57178	48.8163	3.3647e-08	1.69599e-06
LGALS4	1.43132	1.67119	1.18459	2.5237	2.49021	1.79761	-0.661607	2.30981	21.157	6.18025e-05	0.000873874
TMEM143	0.143066	0.251821	0.191404	0.255737	0.375057	0.301869	-0.657601	-0.0154172	5.18732	0.0287269	0.104519
GRWD1	18.5546	19.3694	19.2558	26.8091	31.8504	28.7274	-0.6057	7.11749	166.971	2.66488e-13	5.77595e-11
SPHK2	0.735768	0.917299	0.720927	1.21035	1.10971	1.24526	-0.58127	2.58861	23.5683	2.28746e-05	0.000382493
TRIM28	21.7951	23.0307	23.3688	35.9349	33.6675	37.1435	-0.640918	6.87852	219.24	5.57486e-17	3.13266e-14
VAMP8	28.5603	31.9808	32.4195	54.2429	52.5652	52.6197	-0.772909	5.38254	199.829	2.36066e-16	1.19386e-13
VAMP5	4.13764	4.48681	4.59084	11.4045	10.9667	11.7061	-1.36077	2.70793	143.136	3.5774e-14	9.6922e-12
TMEM150A	0.265258	0.258192	0.220149	0.297859	0.378263	0.503849	-0.654826	0.0653485	5.50284	0.0245501	0.0941541
IL1RN	0.260191	0.261703	0.426759	0.489581	0.534985	0.422922	-0.603665	0.437458	5.71859	0.022076	0.0870434
TMEM185B	1.68959	1.87435	2.04566	3.07398	2.63105	3.66988	-0.736409	2.43051	31.5219	2.20195e-06	5.58663e-05
OSBPL6	0.184394	0.162283	0.213486	0.284074	0.272505	0.287279	-0.585794	1.45767	12.057	0.00134833	0.0104585
NUP35	1.66856	2.27057	1.93938	2.75176	2.91951	3.47409	-0.631357	3.34975	35.9528	1.23909e-06	3.49748e-05
VIL1	1.26634	1.7393	1.55914	2.36477	2.24189	2.56814	-0.647297	3.76663	48.9275	6.83502e-08	3.05903e-06
SEC23B	4.42442	5.54453	5.45047	9.31177	9.30606	9.71986	-0.872579	4.88405	166.49	2.5691e-14	7.35441e-12
COMMD7	2.295	2.51443	2.59382	3.8942	3.93935	3.6097	-0.622659	3.03234	38.0628	3.95583e-07	1.41136e-05
MMP24	0.395857	0.506745	0.524666	0.773067	0.832429	0.865275	-0.785212	1.54921	22.5848	3.12645e-05	0.000497217
FITM2	0.668052	0.683518	0.651951	1.27328	1.09533	1.1756	-0.817881	2.11098	36.7644	5.49069e-07	1.82686e-05
ATP5E	13.2734	14.3271	14.6486	25.8404	24.382	25.9615	-0.845096	6.66152	356.47	2.1841e-20	5.52285e-17
WRB	2.55789	2.80751	2.78927	4.19008	4.41707	4.15578	-0.640324	4.28115	83.3398	6.05102e-11	6.37542e-09
AGPAT3	1.357	1.53226	1.49542	2.42768	2.55163	2.24029	-0.713627	4.45387	104.149	3.18391e-12	4.98003e-10
H1F0	49.6283	54.7447	58.7571	86.1028	84.3808	81.2375	-0.620259	7.34077	168.831	2.58871e-12	4.22322e-10
NPTXR	0.219705	0.303849	0.27321	0.361726	0.414095	0.422249	-0.580941	0.984182	8.39155	0.00634468	0.0344621
GLB1	1.94736	2.33699	1.9479	3.62425	3.69842	3.727	-0.820058	3.66016	90.2543	2.15496e-11	2.62964e-09
CACNA1D	0.046293	0.0478553	0.0529349	0.0883157	0.0793201	0.0656234	-0.65989	0.446332	7.4059	0.00991277	0.0482195
ACOX2	0.480231	0.45542	0.360074	0.735799	0.860461	1.02338	-1.00596	1.36674	30.0393	3.32912e-06	8.05573e-05
MYH15	0.26151	0.308021	0.347033	0.58918	0.459872	0.533549	-0.784724	1.70999	24.1544	1.90379e-05	0.00033089
CSTA	0.655594	0.446067	0.674691	1.03403	1.03081	0.870476	-0.717382	0.181629	7.25228	0.0106409	0.0507204
SELT	5.23726	6.53632	6.14097	13.6494	13.0722	13.7166	-1.16934	5.33256	364.576	6.76803e-19	6.84564e-16
CRIPAK	0.22072	0.198002	0.128922	0.308677	0.251445	0.281011	-0.611711	0.118448	5.01475	0.031334	0.111442
MRFAP1	111.94	120.935	126.264	190.422	177.184	179.592	-0.601982	8.64754	229.018	6.63225e-15	2.14095e-12
CXCL5	19.4647	22.3686	19.8814	36.684	31.2817	28.6639	-0.642264	6.06746	40.0308	0.000439582	0.00424036
ADH5	14.2165	15.7657	15.3474	23.5305	22.1386	23.5096	-0.604466	6.53793	178.191	1.36748e-15	5.92781e-13
BDH2	0.258249	0.503756	0.451006	1.19273	0.957395	1.01377	-1.37883	1.34338	47.6922	4.29922e-08	2.07732e-06
OSTC	9.98726	9.71593	10.3287	22.9512	22.4539	22.3023	-1.16726	4.72389	350.788	2.849e-20	6.175e-17
PCDHB7	0.154698	0.261685	0.101312	0.291083	0.412056	0.400251	-1.07615	0.101089	13.0734	0.000900916	0.00761912
PCDHB8	0.850274	1.09817	1.33245	1.52717	1.80787	1.64046	-0.594347	1.93533	15.1032	0.000414541	0.00404733
PCDHB13	0.0941592	0.0841834	0.161503	0.211622	0.193603	0.231018	-0.899473	-0.185738	8.58451	0.00582355	0.0322935
PCDHGA2	0.106307	0.194049	0.16208	0.344496	0.271202	0.142969	-0.711288	0.51424	6.30193	0.0180988	0.0755628
PCDHGA3	0.135738	0.267593	0.212332	0.41887	0.340496	0.175841	-0.599993	0.398966	4.22789	0.048814	0.152639
PCDHGA4	0.216693	0.337825	0.278756	0.530054	0.467824	0.308358	-0.643953	0.849461	8.02722	0.00749505	0.0390907
PCDHGA5	0.17548	0.311197	0.228116	0.473558	0.455759	0.208471	-0.665053	0.87055	6.00188	0.0229585	0.0896317
PCDHGA6	0.113797	0.205351	0.165334	0.308588	0.264948	0.193796	-0.659221	0.773596	7.95108	0.0077567	0.0399202
PCDHGA7	0.141054	0.24461	0.190214	0.402692	0.335029	0.157523	-0.63273	0.478428	4.78166	0.0375635	0.127043
PCDHGA8	0.0764185	0.1568	0.113248	0.241569	0.197979	0.0989954	-0.632758	0.41802	4.49503	0.0435658	0.141054
PCDHGA12	0.148455	0.270983	0.203705	0.434522	0.350462	0.178068	-0.624569	0.41325	4.67301	0.0388411	0.129744
PCDHGC4	0.133064	0.262321	0.197194	0.410617	0.344731	0.161929	-0.626544	0.389326	4.31381	0.0477009	0.150118
PCDHGC5	0.132637	0.26148	0.196562	0.409301	0.343626	0.16141	-0.626544	0.389326	4.31381	0.0477009	0.150118
CDHR2	1.32174	1.29955	1.61497	2.62674	2.49883	2.35624	-0.815808	3.39475	72.1595	3.67869e-10	3.20765e-08
GCNT2	1.4916	1.58852	1.71263	2.36912	2.65499	2.33641	-0.612706	4.2013	66.8367	9.29547e-10	7.3073e-08
TRIM10	0.164252	0.330413	0.291972	0.597048	0.406802	0.366354	-0.798913	0.41768	8.79315	0.00533184	0.0302523
MDC1	11.5891	15.0444	14.2208	25.0989	27.781	26.2911	-0.948666	7.33358	79.343	0.000265548	0.00282903
MED20	1.61528	1.90898	1.84519	3.2293	3.24649	3.5826	-0.899727	3.08739	78.532	1.28641e-10	1.2401e-08
LRRC1	0.70822	0.690584	0.756668	1.31734	1.1505	1.07705	-0.713205	2.23887	29.3673	4.02813e-06	9.56412e-05
MYB	0.467508	0.683521	0.83329	1.17894	0.966209	1.02168	-0.671777	2.25773	18.8582	0.000169546	0.00197417
SF3B5	6.41805	8.83766	8.41351	12.5795	12.8821	13.2721	-0.704999	2.86234	38.8682	3.23754e-07	1.19805e-05
GPER1	0.899576	1.0401	1.02961	1.78758	1.5212	1.61716	-0.725914	2.07416	27.782	6.3678e-06	0.000136845
HOXA5	0.728939	0.998364	0.893822	1.61964	1.88146	1.01979	-0.778581	1.06211	13.0607	0.00092782	0.0077902
HOXA6	1.13315	1.32623	1.25097	2.71365	2.30871	1.83996	-0.8823	1.21918	21.0848	5.09177e-05	0.000742811
CREB5	0.437688	0.504098	0.60914	0.832097	0.91626	0.883568	-0.757179	3.03567	48.3602	3.56349e-08	1.76684e-06
ASNS	5.79407	5.55278	4.12812	8.17389	8.09495	7.03346	-0.584429	4.85132	22.0994	0.00178995	0.0130815
SYPL1	4.03159	4.11199	3.52716	6.1558	6.08605	5.8005	-0.622498	3.80294	58.3459	4.53444e-09	2.91511e-07
TSPAN12	0.330144	0.181844	0.258866	0.384557	0.614168	0.432001	-0.878442	0.365526	10.7762	0.00227544	0.0158435
IMPDH1	10.9599	12.2961	11.8372	18.2963	17.5924	17.3614	-0.596269	5.75451	140.907	4.49728e-14	1.19707e-11
C7orf73	0.375905	0.448305	0.381328	0.707311	0.524472	0.632417	-0.625164	1.37132	12.3644	0.00119223	0.00948034
MTPN	4.88111	5.21984	4.67686	8.2211	8.86817	8.76843	-0.800762	4.68002	157.858	8.45142e-15	2.61683e-12
CTAGE15	0.399112	0.360258	0.294889	0.539164	0.547083	0.552377	-0.627456	0.284036	6.16017	0.017814	0.0747024
CTSB	20.9358	23.0864	21.9968	37.0828	35.3921	34.7683	-0.694508	7.74488	314.537	1.71264e-19	2.3622e-16
CHMP7	6.70032	7.49876	8.02058	16.1225	16.1172	15.4685	-1.09701	5.77674	411.824	9.45198e-21	2.86811e-17
LEPROTL1	3.20369	3.77246	3.69909	5.70652	5.52782	5.42066	-0.636492	4.6302	90.9783	1.94059e-11	2.39371e-09
HGSNAT	0.319718	0.407925	0.405196	0.651721	0.75477	0.659496	-0.859991	2.27147	41.6617	1.6433e-07	6.63088e-06
ATP6V1C1	6.71476	7.05414	6.92432	10.553	10.5409	10.9771	-0.626411	5.68696	167.892	3.36253e-15	1.21467e-12
GRINA	3.93921	3.7092	4.52836	6.26875	6.38698	5.96337	-0.607152	3.70443	50.0276	2.48345e-08	1.29537e-06
C8orf33	26.0982	26.51	26.8262	41.8958	47.1187	42.2416	-0.718517	6.89047	267.989	2.3e-18	2.18098e-15
FAM214B	0.417213	0.336541	0.378352	0.785037	0.615777	0.672957	-0.86881	1.80509	31.9091	1.97978e-06	5.11708e-05
PAX5	0.102119	0.0798876	0.0875783	0.138775	0.230384	0.15868	-0.955131	0.37044	13.3616	0.000805028	0.00694366
EPB41L4B	3.62894	3.46076	3.52025	6.17707	6.12814	6.28853	-0.803635	5.26385	229.469	2.72216e-17	1.65202e-14
PORCN	0.298848	0.229859	0.153777	0.760785	0.487961	0.431305	-1.29243	0.323945	20.7891	5.6947e-05	0.000815094
GRIPAP1	8.96671	9.49368	9.42305	14.1012	15.0191	13.289	-0.599174	6.32544	161.18	6.19652e-15	2.04377e-12
CHIC1	0.885152	1.00158	0.977685	1.364	1.34145	1.62503	-0.590607	3.06803	32.699	1.59667e-06	4.32583e-05
MID2	0.444517	0.309531	0.299112	0.418207	0.615181	0.687926	-0.696297	0.571429	8.05569	0.00737468	0.0386268
NXT2	0.7258	1.26884	1.04038	1.51201	1.54563	1.66202	-0.631247	2.00724	16.5757	0.000256791	0.00275923
UBE2A	3.18637	3.58341	3.81108	5.514	5.6849	5.87989	-0.685112	4.60815	103.367	3.52732e-12	5.40571e-10
RP11-266K22.2	32.2035	34.8169	38.2307	90.2682	90.3319	86.8822	-1.34026	4.77388	417.782	1.55089e-21	7.31017e-18
RP11-67L3.5	103.734	121.425	108.509	156.115	192.32	173.378	-0.638662	6.35767	75.1908	2.29481e-06	5.79317e-05
GDI2P2	0.87087	1.92704	1.61323	2.70377	1.88015	2.99133	-0.777125	0.349774	8.01146	0.00754842	0.0392342
GEMIN8P4	1.41633	1.09581	1.15859	1.9475	1.64275	1.92458	-0.581085	0.230892	5.09332	0.0301163	0.10816
RP11-46A10.5	0.327654	0.428425	0.370918	0.760376	0.696154	0.857485	-1.03059	0.536117	18.8478	0.000108239	0.00137538
RP11-629N8.5	2.5739	4.21614	3.25434	6.50361	4.15821	4.47464	-0.590139	0.653442	6.06248	0.0186737	0.077419
RP1-267D11.6	0.303432	0.356061	0.338293	0.487681	0.454922	0.558348	-0.582251	-0.108457	4.20352	0.0475972	0.149978
LINC01232	0.179372	0.22337	0.210968	0.220989	0.311733	0.398173	-0.591221	0.721402	6.52038	0.0149951	0.0660011
RP11-203M5.8	27.5506	26.8447	31.0113	56.548	51.0049	57.6669	-0.947107	4.36709	168.583	3.16094e-15	1.19636e-12
RP11-1012A1.7	1.31062	1.49399	0.899195	1.89066	2.15583	2.40096	-0.788163	0.112828	8.26312	0.0067191	0.0359204
RP11-56B16.4	8.82481	7.62299	7.95999	12.8444	11.9009	12.0739	-0.587564	2.39779	23.0257	2.71589e-05	0.00044023
RP11-407G23.7	4.7326	5.32565	4.77401	11.9027	12.2839	12.3701	-1.2944	2.29588	100.952	4.85795e-12	7.22596e-10
RP11-410D17.2	3.58622	4.00673	3.24085	5.00018	6.53625	4.92338	-0.595189	3.60605	33.9579	3.2884e-06	7.96991e-05
VAC14-AS1	0.190935	0.104252	0.145969	0.261751	0.246768	0.235566	-0.745906	0.0220499	6.96372	0.0121687	0.0563736
RP11-77K12.8	1.26069	0.934324	0.921844	1.49819	1.84178	1.36746	-0.583743	0.130622	4.70006	0.0367782	0.125138
RP4-536B24.2	1.92726	2.39756	0.78292	2.38577	3.02415	2.58823	-0.633556	0.257839	4.797	0.0355546	0.122265
RP11-159D12.2	0.501065	0.522302	0.384401	0.771393	0.71181	0.657145	-0.598218	1.80769	15.3254	0.000381612	0.00378914
AC004623.2	1.84015	1.43291	1.6494	2.84816	2.56307	2.67974	-0.709814	0.0344673	6.77248	0.0133104	0.0603902
AC022154.7	1.65216	1.84195	1.35204	2.62184	2.43524	2.71539	-0.674959	1.51589	16.3959	0.000257574	0.00276373
AC062029.1	0.210164	0.341946	0.324428	0.378002	0.49567	0.467102	-0.604578	0.709867	7.00894	0.0119144	0.0554667
RP4-614O4.13	0.9604	0.765494	1.00702	1.29566	1.5276	1.65387	-0.703819	0.856875	11.1527	0.00194745	0.0140032
Z83844.1	0.313065	0.643459	0.420241	0.768353	0.755649	0.601121	-0.619388	0.252506	5.18835	0.0287121	0.10449
DUBR	0.138478	0.177268	0.32389	0.361235	0.310612	0.327398	-0.641407	0.268489	5.34141	0.0265979	0.0992075
EXOC3-AS1	0.604948	0.624475	0.507886	0.629051	0.998352	1.03115	-0.600975	0.345693	5.41393	0.0256559	0.0967434
PP7080	1.47399	1.48256	1.17217	2.33226	1.91879	2.03834	-0.602292	2.28476	20.6309	5.91786e-05	0.000843059
MDC1-AS1	30.2053	40.4836	37.1397	65.2723	75.4563	73.3335	-0.983031	5.30921	114.934	3.54759e-07	1.28766e-05
RP3-523E19.2	2.03203	1.92704	2.62896	4.15124	4.89435	4.04541	-0.982285	0.633833	18.1822	0.000136365	0.00166045
AC091729.9	0.409944	0.332521	0.313011	0.58474	0.77492	0.519117	-0.818899	0.047116	8.56591	0.00587174	0.0324303
HOXA-AS3	0.270645	0.330231	0.255699	0.525949	0.396834	0.46155	-0.688236	1.19716	13.1598	0.000870955	0.00740288
HOTTIP	0.147784	0.127408	0.179247	0.258211	0.22247	0.227911	-0.635999	0.0407311	5.38798	0.0259887	0.0974304
RP11-62J1.3	0.745397	1.16337	1.34905	1.42674	1.45335	2.57296	-0.737206	0.633769	8.15819	0.00743974	0.038869
RP11-1149O23.2	0.955906	1.25408	0.940979	1.25124	2.13637	1.75387	-0.691267	-0.101215	5.47609	0.0248772	0.0948145
RP11-863K10.7	0.241138	0.306365	0.287346	0.549253	0.534953	0.535579	-0.947534	-0.136213	10.6848	0.00236372	0.0162863
